# Supplementary material for: Factors associated with the health-related quality of life among people with Duchenne muscular dystrophy: a study using the Health Utilities Index (HUI)
Source: PubMed Central journal article supplement (PMC9188127; doi:10.1186/s12955-022-02001-0), 2022-06-11

Appendix figure 2 HUI3 and HUI2 utility by time since LOA, with a black smoothing line and colors denoting individual patients (n=6)

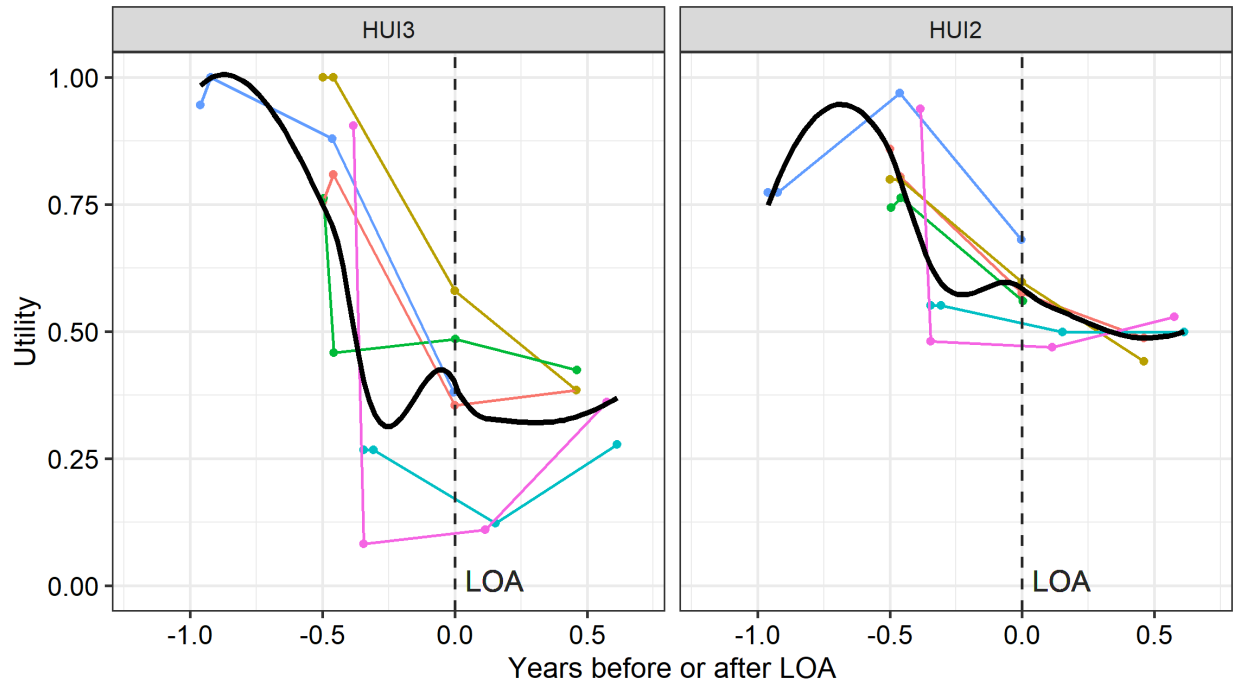

Supplement: 12955_2022_2001_MOESM6_ESM.pdf [file 12955_2022_2001_MOESM6_ESM.pdf]
